# Supplementary material for: The Role of Chlorine in the Formation and Development of Tap Water Biofilms under Different Flow Regimes
Source: MDPI journal article supplement (doi:10.3390/microorganisms11112680), 2023-10-31
Supplement: s1 [file s1]

## Supplementary Material

# *The role of chlorine in the formation and development of tap water biofilms under different flow regimes*

Erifyli Tsagkari <sup>1\*</sup>, William Sloan <sup>2</sup>**Table S1.** Concentration of total chlorine in preliminary experiment in raw water.

| Concentration of total chlorine (mg/L) |       | reactor    |         |         |         |
|----------------------------------------|-------|------------|---------|---------|---------|
|                                        | hours | incubation | 217 rpm | 169 rpm | 121 rpm |
| preliminary experiment/raw water       | 0     | 0.25       | 0.23    | 0.23    | 0.24    |
|                                        | 2     | 0.1        | 0.11    | 0.1     | 0.12    |
|                                        | 4     | 0.09       | 0.07    | 0.09    | 0.08    |
|                                        | 6     | 0.06       | 0.05    | 0.05    | 0.07    |
|                                        | 8     | 0          | 0       | 0       | 0       |
|                                        | 24    | 0          | 0       | 0       | 0       |
| average                                |       | 0.08       | 0.08    | 0.08    | 0.09    |
| st dev                                 |       | 0.092      | 0.086   | 0.086   | 0.089   |

**Table S2.** Concentration of total chlorine in preliminary experiment in raw water with the addition of sodium hypochlorite.

| Concentration total chlorine (mg/L)            |       | reactor    |         |         |         |
|------------------------------------------------|-------|------------|---------|---------|---------|
|                                                | hours | incubation | 217 rpm | 169 rpm | 121 rpm |
| preliminary experiment/add sodium hypochlorite | 0     | 1.03       | 1.01    | 1       | 1.01    |
|                                                | 2     | 0.83       | 0.74    | 0.89    | 0.82    |
|                                                | 4     | 0.62       | 0.61    | 0.73    | 0.73    |
|                                                | 6     | 0.61       | 0.6     | 0.64    | 0.66    |
|                                                | 8     | 0.56       | 0.54    | 0.51    | 0.55    |
|                                                | 24    | 0.43       | 0.41    | 0.46    | 0.51    |
| average                                        |       | 0.68       | 0.65    | 0.71    | 0.71    |
| st dev                                         |       | 0.215      | 0.206   | 0.212   | 0.185   |

**Table S3** Concentration of total chlorine in chlorine experiment in the incubator and in the reactor.

| Concentration total chlorine<br>(mg/L) | chlorine experiment |        |          |      |      |         | st dev |
|----------------------------------------|---------------------|--------|----------|------|------|---------|--------|
|                                        | Days                | 0 hour | 24 hours |      |      | average |        |
| incubation                             | 1                   | 1.02   | 0.63     | 0.63 | 0.62 | 0.63    | 0.01   |
|                                        | 2                   | 1.01   | 0.59     | 0.59 | 0.59 | 0.59    | 0.00   |
|                                        | 3                   | 1.01   | 0.61     | 0.6  | 0.61 | 0.61    | 0.01   |
|                                        | 4                   | 1.03   | 0.63     | 0.62 | 0.61 | 0.62    | 0.01   |
|                                        | 5                   | 1.01   | 0.62     | 0.62 | 0.62 | 0.62    | 0.00   |
|                                        | 6                   | 1.02   | 0.65     | 0.64 | 0.65 | 0.65    | 0.01   |
|                                        | 7                   | 1.02   | 0.59     | 0.58 | 0.58 | 0.58    | 0.01   |
| reactor 217 rpm                        | 8                   | 1.01   | 0.58     | 0.58 | 0.58 | 0.58    | 0.00   |
| reactor 169 rpm                        | 9                   | 1.02   | 0.62     | 0.62 | 0.64 | 0.63    | 0.01   |
| reactor 121 rpm                        | 10                  | 1.01   | 0.54     | 0.52 | 0.54 | 0.53    | 0.01   |

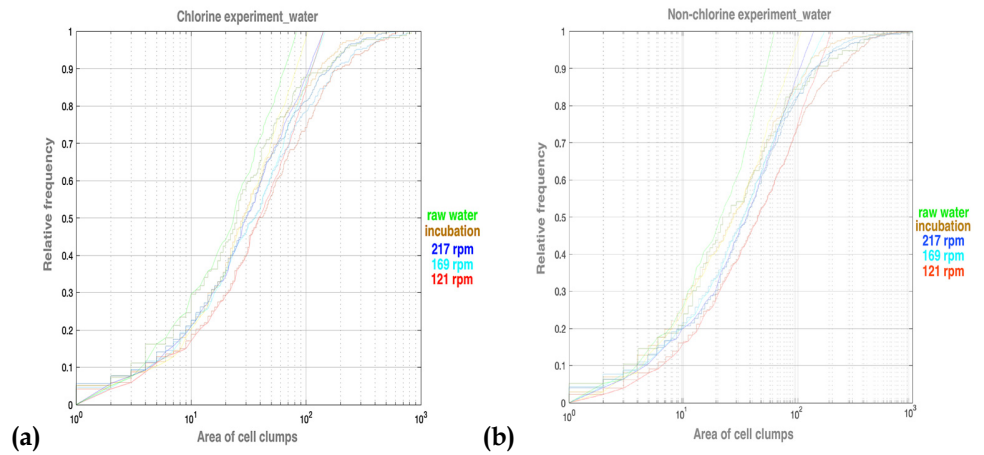**Figure S1.** Relative frequency figures for the area of cell clumps (in square pixels) in water for (a) chlorine experiment and (b) non-chlorine experiments.

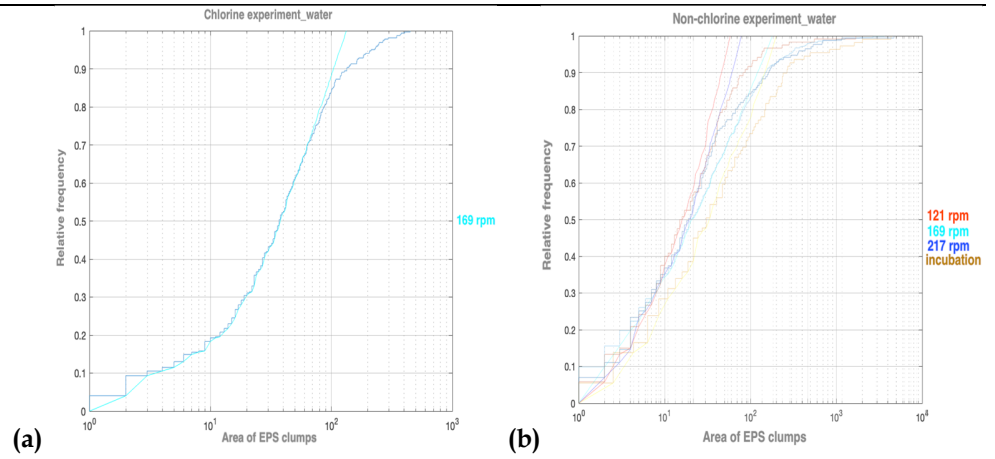

**Figure S2.** Relative frequency figures for the area of EPS clumps (in pixels) in water for (a) chlorine and (b) non-chlorine experiments.

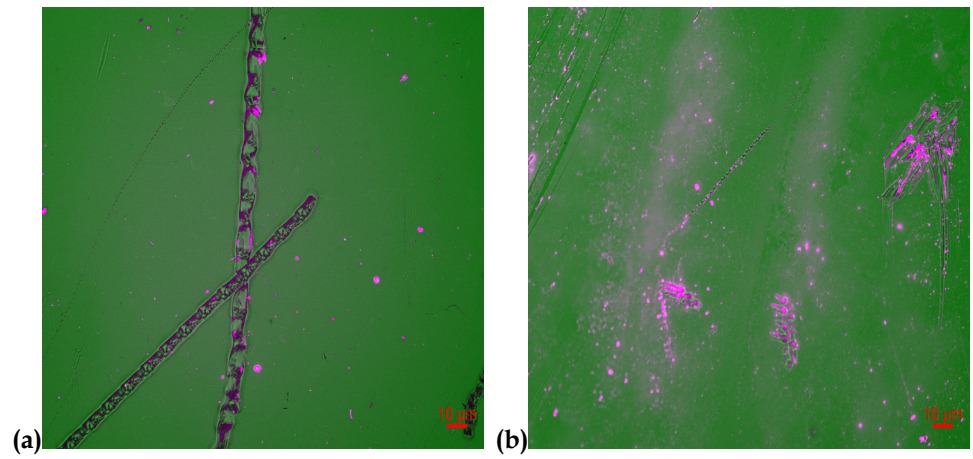

**Figure S3.** Biofilm (EPS in green colour and cells in purple colour) images from EVOS FL Auto 2 cell imaging system using a 100X oil immersion objective lens. These images were selected randomly to indicate (a) filamentous structures and (b) round/patchy structures found in biofilms.

**Table S4.** Statistical results for biomass measures of the same flow regime between chlorine and non-chlorine experiment: x- significant differences were found ( $P < 0.05$ ).

| Measures/<br>Flow regimes | Number of<br>cell clumps/<br>water | Number of<br>EPS<br>clumps/<br>water | Area of<br>cell clumps/<br>water | Area of EPS<br>clumps/<br>water | Cell/<br>mL | Biofilm<br>thickness | Biofilm<br>density | Number of<br>cell clumps/<br>slides | Number of<br>EPS clumps/<br>slides | Area of<br>cell clumps/<br>slides | Area of<br>EPS<br>clumps/<br>slides | Coverage<br>area of<br>cell<br>clumps/<br>slides | Coverage<br>area of<br>EPS clumps/<br>slides |
|---------------------------|------------------------------------|--------------------------------------|----------------------------------|---------------------------------|-------------|----------------------|--------------------|-------------------------------------|------------------------------------|-----------------------------------|-------------------------------------|--------------------------------------------------|----------------------------------------------|
| raw water<br>incubation   |                                    |                                      |                                  |                                 | x           | x                    |                    |                                     | x                                  |                                   |                                     |                                                  |                                              |
| 217 rpm                   |                                    |                                      | x                                |                                 | x           |                      | x                  |                                     | x                                  | x                                 |                                     |                                                  |                                              |
| 169 rpm                   |                                    | x                                    | x                                |                                 |             |                      | x                  |                                     |                                    |                                   |                                     |                                                  |                                              |
| 121 rpm                   |                                    |                                      | x                                |                                 | x           |                      | x                  | x                                   | x                                  |                                   |                                     |                                                  |                                              |

**Table S5.** Statistical results for biomass between the different flow regimes in chlorine experiment: 1- incubation, 2- 217 rpm, 3- 169 rpm, 4- 121 rpm, 5- raw water, x- significant differences were found ( $P < 0.05$ ).

| Measures/<br>Flow-<br>regimes | Number of<br>cell clumps/<br>water | Number<br>of EPS<br>clumps/<br>water | Area of<br>cell<br>clumps/<br>water | Area of<br>EPS<br>clumps/<br>water | Cells/<br>mL | Biofilm<br>thickness | Biofilm<br>density | Number of<br>cell<br>clumps/<br>slides | Number<br>of<br>EPS<br>clumps/<br>slides | Area of<br>cell<br>clumps/<br>slides | Area of<br>EPS<br>clumps/<br>slides | Coverage<br>area of<br>cell<br>clumps/<br>slides | Coverage<br>area of<br>EPS<br>clumps/<br>slides |
|-------------------------------|------------------------------------|--------------------------------------|-------------------------------------|------------------------------------|--------------|----------------------|--------------------|----------------------------------------|------------------------------------------|--------------------------------------|-------------------------------------|--------------------------------------------------|-------------------------------------------------|
| 1-2                           |                                    |                                      | x                                   |                                    |              | x                    |                    |                                        | x                                        |                                      |                                     |                                                  | x                                               |
| 1-3                           |                                    |                                      |                                     | x                                  |              | x                    | x                  |                                        | x                                        |                                      | x                                   |                                                  | x                                               |
| 1-4                           |                                    |                                      |                                     | x                                  |              | x                    | x                  |                                        | x                                        | x                                    | x                                   | x                                                | x                                               |
| 1-5                           | x                                  |                                      | x                                   | x                                  | x            |                      |                    |                                        |                                          |                                      |                                     |                                                  |                                                 |
| 2-3                           |                                    | x                                    |                                     | x                                  | x            | x                    | x                  | x                                      | x                                        |                                      |                                     |                                                  | x                                               |
| 2-4                           |                                    |                                      |                                     |                                    |              |                      | x                  | x                                      | x                                        |                                      | x                                   | x                                                | x                                               |
| 2-5                           |                                    |                                      |                                     |                                    | x            |                      |                    |                                        |                                          |                                      |                                     |                                                  |                                                 |
| 3-4                           |                                    |                                      |                                     |                                    |              |                      |                    |                                        | x                                        |                                      |                                     |                                                  |                                                 |
| 3-5                           |                                    |                                      |                                     |                                    |              |                      |                    |                                        |                                          |                                      |                                     |                                                  |                                                 |
| 4-5                           | x                                  |                                      | x                                   |                                    | x            |                      |                    |                                        |                                          |                                      |                                     |                                                  |                                                 |

**Table S6.** Statistical results for biomass between the different flow regimes in non-chlorine experiment: 1- incubation, 2- 217 rpm, 3- 169 rpm, 4- 121 rpm, 5- raw water, x- significant differences were found ( $P < 0.05$ ).

| Measures/<br>Flow<br>regimes | Number of<br>cell clumps/<br>water | Number<br>of<br>EPS<br>clumps/<br>water | Area of<br>cell<br>clumps/<br>water | Area of<br>EPS<br>clumps/<br>water | Cell/<br>mL | Biofilm<br>thickness | Biofilm<br>density | Number<br>of<br>cell<br>clumps/<br>slides | Number<br>of<br>EPS<br>clumps/<br>slides | Area of<br>cell<br>clumps/<br>slides | Area of<br>EPS<br>clumps/<br>slides | Coverage<br>area of<br>cell<br>clumps/<br>slides | Coverage<br>area of<br>EPS<br>clumps/<br>slides |
|------------------------------|------------------------------------|-----------------------------------------|-------------------------------------|------------------------------------|-------------|----------------------|--------------------|-------------------------------------------|------------------------------------------|--------------------------------------|-------------------------------------|--------------------------------------------------|-------------------------------------------------|
| 1-2                          |                                    |                                         |                                     |                                    |             | x                    |                    |                                           | x                                        |                                      |                                     | x                                                | x                                               |
| 1-3                          |                                    |                                         | x                                   |                                    |             | x                    |                    |                                           | x                                        | x                                    |                                     | x                                                |                                                 |
| 1-4                          |                                    |                                         | x                                   |                                    |             | x                    | x                  | x                                         | x                                        | x                                    |                                     | x                                                | x                                               |
| 1-5                          | x                                  |                                         | x                                   |                                    |             |                      |                    |                                           |                                          |                                      |                                     |                                                  |                                                 |
| 2-3                          |                                    |                                         | x                                   |                                    |             | x                    | x                  |                                           | x                                        | x                                    |                                     | x                                                |                                                 |
| 2-4                          |                                    |                                         |                                     |                                    |             | x                    | x                  | x                                         | x                                        |                                      |                                     | x                                                |                                                 |
| 2-5                          | x                                  | x                                       | x                                   |                                    | x           |                      |                    |                                           |                                          |                                      |                                     |                                                  |                                                 |
| 3-4                          |                                    |                                         |                                     |                                    |             | x                    |                    | x                                         | x                                        |                                      |                                     | x                                                |                                                 |
| 3-5                          | x                                  | x                                       |                                     |                                    | x           |                      |                    |                                           |                                          |                                      |                                     |                                                  |                                                 |
| 4-5                          | x                                  | x                                       | x                                   | x                                  | x           |                      |                    |                                           |                                          |                                      |                                     |                                                  |                                                 |
